# Supplementary material for: The design of anti-fouling and anti-hydrolysis cyclic peptides for accurate electrochemical antigen testing in human blood
Source: Royal Society of Chemistry journal article supplement (doi:10.1039/d2sd00213b), 2022-12-22
Supplement: d2sd00213b1.pdf [file d2sd00213b1.pdf]

1

## Supporting Information

# 2 **The Design of Anti-fouling and Anti-hydrolysis Cyclic Peptides** 3 **for Accurate Electrochemical Antigen Testing in Human Blood**

4

5 Rui Han, Wenjie Hou, Yang Li, Min Chen, Caifeng Ding\*, Xiliang Luo\*

6

7 Key Laboratory of Optic-electric Sensing and Analytical Chemistry for Life Science,

8 MOE; Shandong Key Laboratory of Biochemical Analysis; College of Chemistry and

9 Molecular Engineering, Qingdao University of Science and Technology, Qingdao

10 266042, China

11

12

13

14 **Contents**

15 1. Supplementary Note

16 2. Supplementary Figures

17 3. Supplementary Tables

18

## 19 **1. Supplementary Note**

20

### 21 **1. Instrument**

22 A three-electrode electrochemical system was constructed to perform  
23 electrochemical measurements such as cyclic voltammetry (CV), differential pulse  
24 voltammetry (DPV) and amperometric i-t curve, on a CHI 660E electrochemical  
25 workstation (Shanghai Chenhua Instruments Co., Ltd., China), which consists of a  
26 working glassy carbon electrode (GCE), a reference saturated calomel electrode and an  
27 auxiliary platinum electrode. The structures of the cyclic and linear peptides were  
28 confirmed by <sup>1</sup>H-NMR spectroscopy with a Bruker AV 600 NMR spectrometer and  
29 electronic circular dichroism spectra (CD) were recorded utilizing J-1100 instrument  
30 (Jasco, Japan) with wavelengths of 190-260 nm. Zeta potentials of peptides were  
31 investigated by ZEN3600 zeta potential analyzer (Malvern, U.K.). Scanning electron  
32 microscopy (SEM) was performed with a Hitachi S4800 scanning electron microscope  
33 (Hitachi, Japan). The water contact angles of all modified surfaces were measured by  
34 means of a JC2000D1 meter (Shanghai, China). X-ray photoelectron spectroscopy  
35 (XPS) was performed using the Thermo Fisher Scientific XPS System. TCS-SP5 laser

36 confocal microscopy (Leica, Germany) was used for fluorescent analysis of proteins,  
37 cells and bacteria adsorption.

## 38 **2. Optimization of the incubation time for the RBD**

39 To determine the optimal incubation time for the target, the biosensor was  
40 incubated with the RBD solution ( $100.0 \text{ ng mL}^{-1}$ ) for different time periods, and the  
41 DPV signal was recorded accordingly. It was clearly found that the response signal  
42 increased with the extension of incubation time and reached a maximum at 60 min, as  
43 shown in Fig. S9. Therefore, the incubation time for target detection was selected as 60  
44 min.

45

46

## 47 2. Supplementary Figures

48

### (A) Cyclic peptide (cPep): c(CEKEKEKEK)

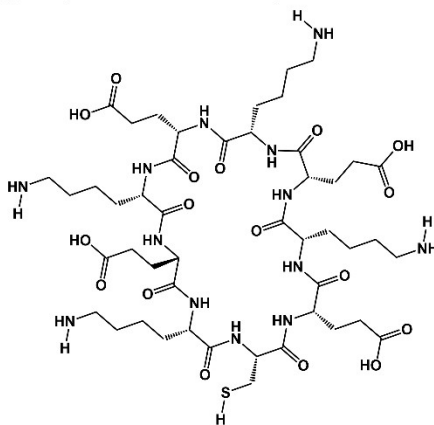

### (B) Linear peptide 1 (lPep 1): CEKEKEKEK

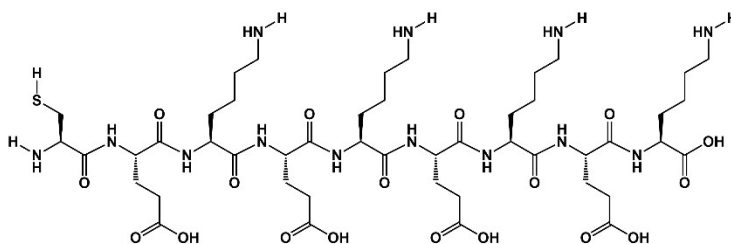

### (C) Linear peptide 2 (lPep 2): CPPPPEKEKEKEK

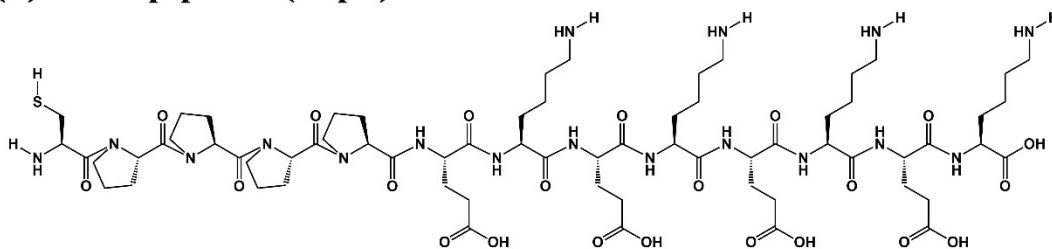

49

50 **Fig. S1** The molecular structure of cyclic peptide (A), linear peptide 1 (B) and 2 (C).

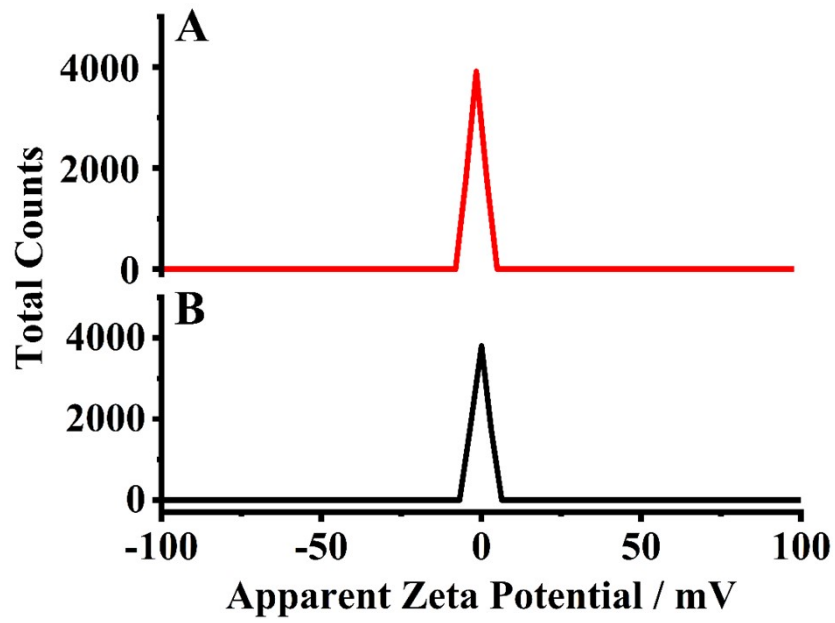

51

52 **Fig. S2** Zeta potentials of the cyclic peptide (A) and linear peptide 1 (B).

53

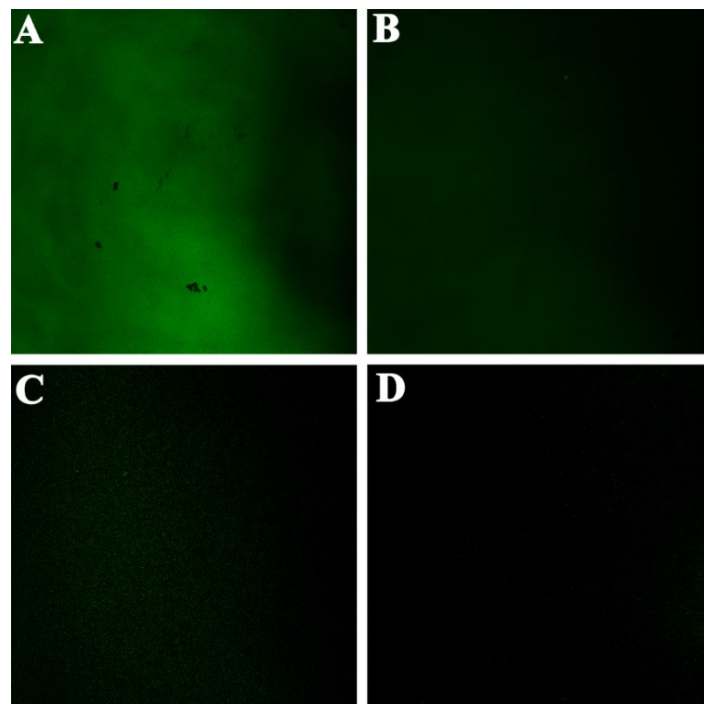

54

55 **Fig. S3** Fluorescent images of FITC-BSA ( $10.0 \text{ mg mL}^{-1}$ ) adsorption on peptide-free

56 surface (A), and lPep1 (B), lPep2 (C) and cPep (D) modified surfaces.

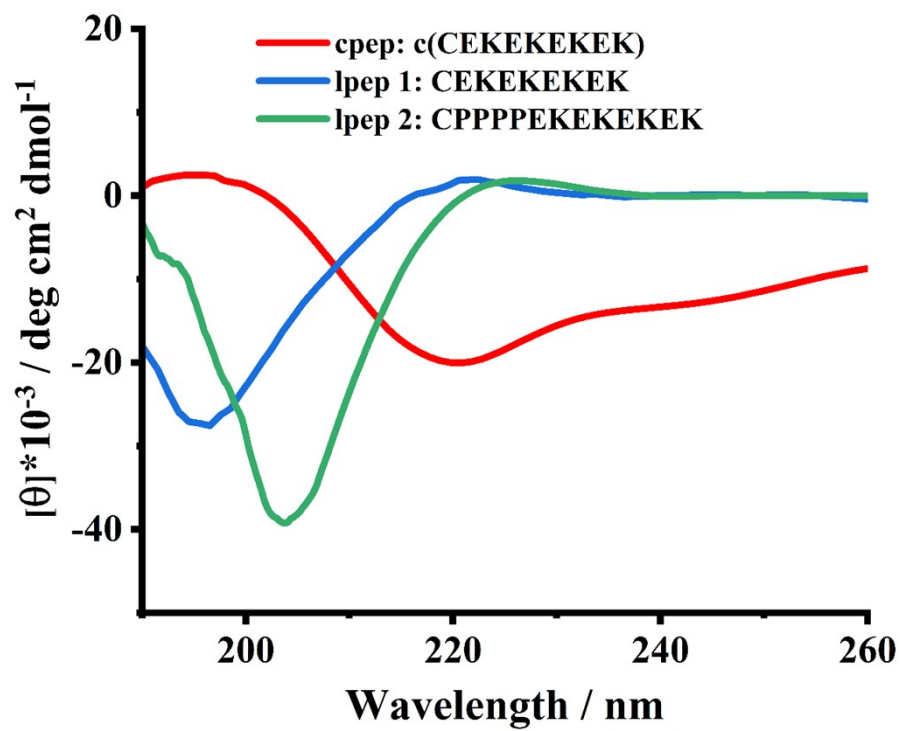

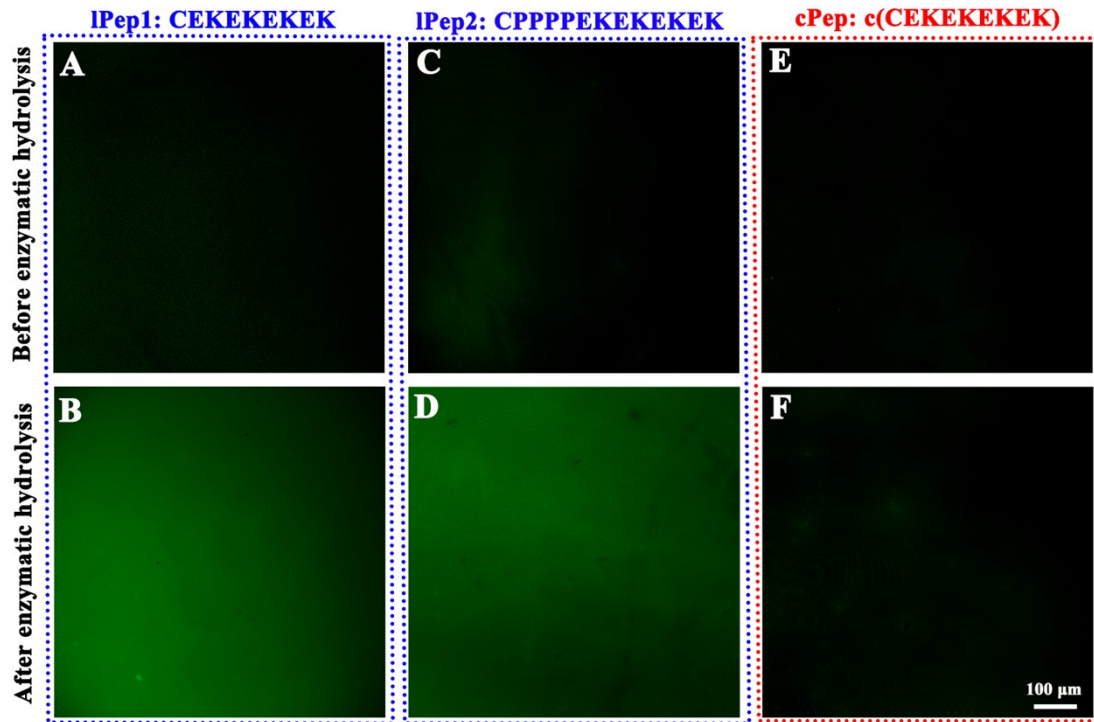

63

64 **Fig. S5** Fluorescent images of FITC-BSA adsorption on lPep1 (A, B), lPep2 (C, D) and

65 cPep (E, F) modified surfaces before (A, C, E) and after (B, D, F) enzymatic hydrolysis

66 of cPB. Scale bar = 100 μm.

67

68

69

70



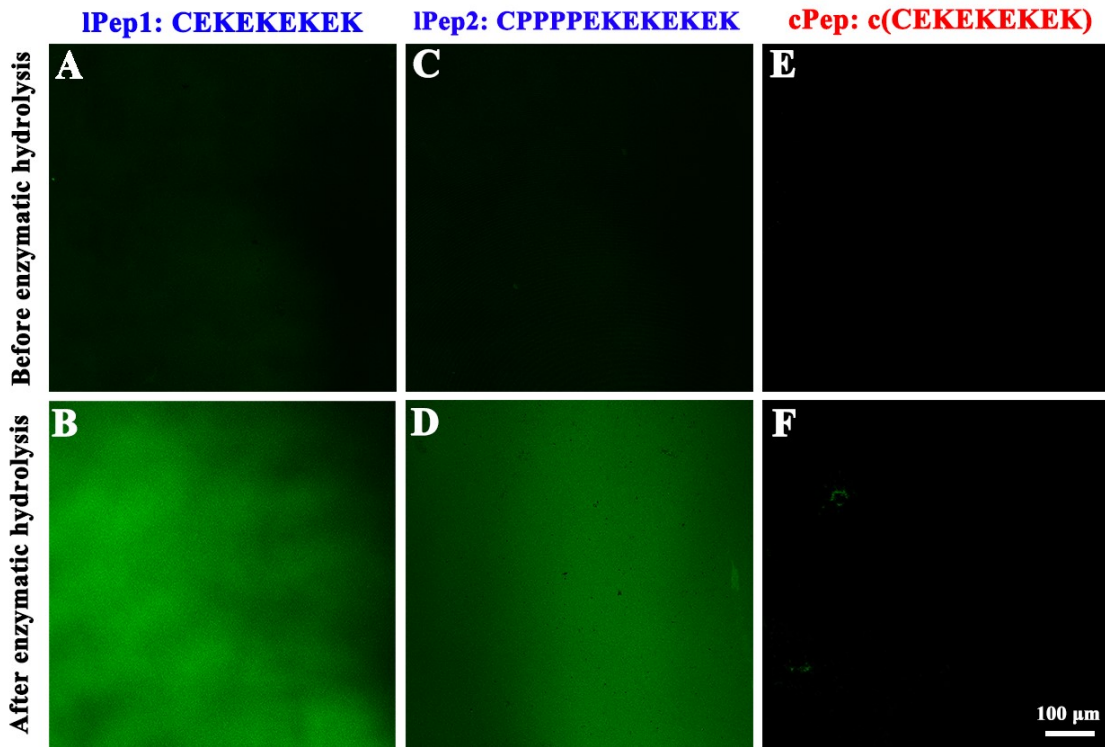

71

72 **Fig. S6** Fluorescent images of FITC-BSA adsorption on lPep1 (A, B), lPep2 (C, D) and

73 cPep (E, F) modified surfaces before (A, C, E) and after (B, D, F) enzymatic hydrolysis

74 of Ap. Scale bar = 100  $\mu\text{m}$ .

75

76

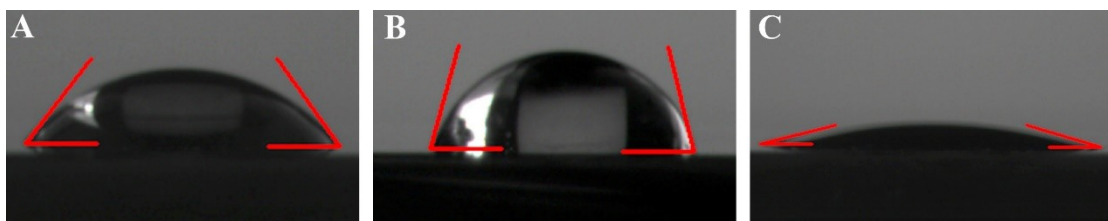

77

78 **Fig. S7** Water contact angle images of the PEDOT/GCE (A), AuNP/PEDOT/GCE (B),

79 and cPep/PEDOT/GCE (C) surfaces.

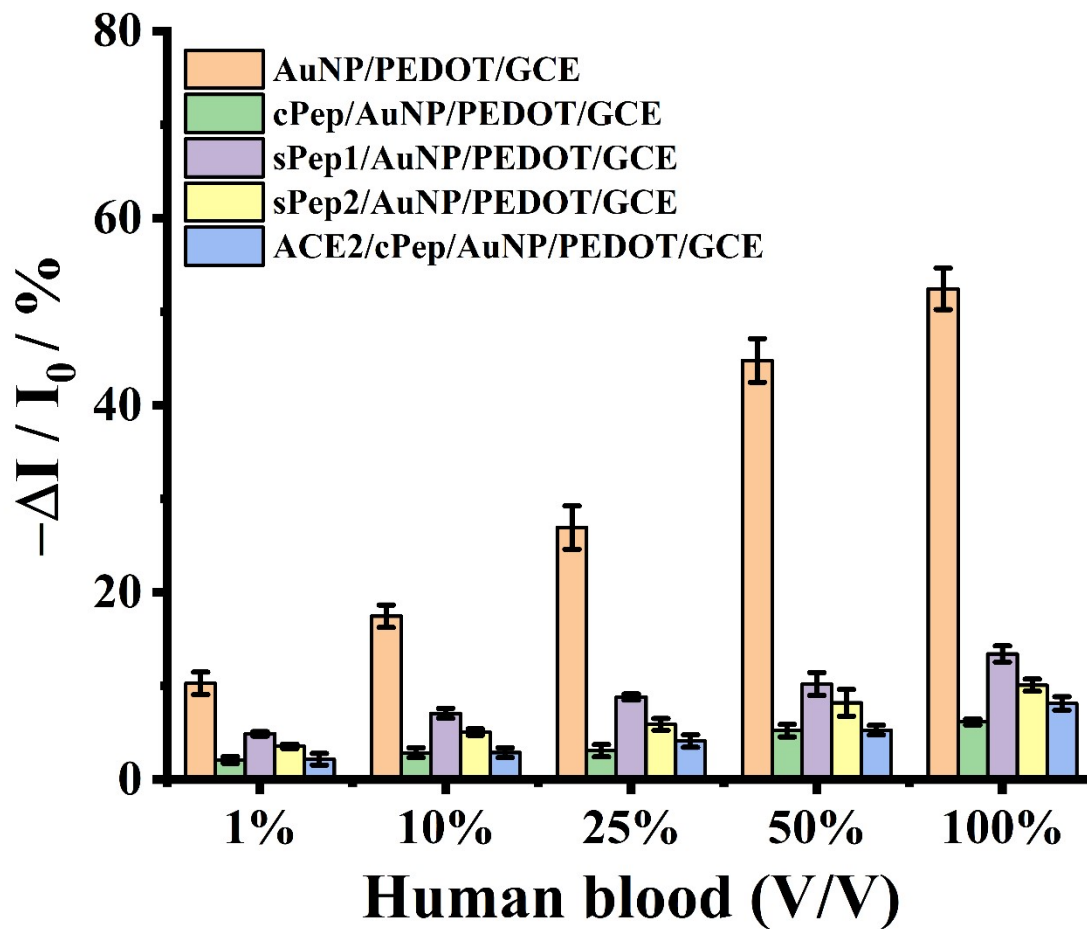

80

81 **Fig. S8** Comparative antifouling characteristics of various modified electrodes after

82 soaking in human blood with different concentrations (V/V) for 30 min. Error bars

83 represent the standard deviations of three parallel detections.

84

85

86

87

88

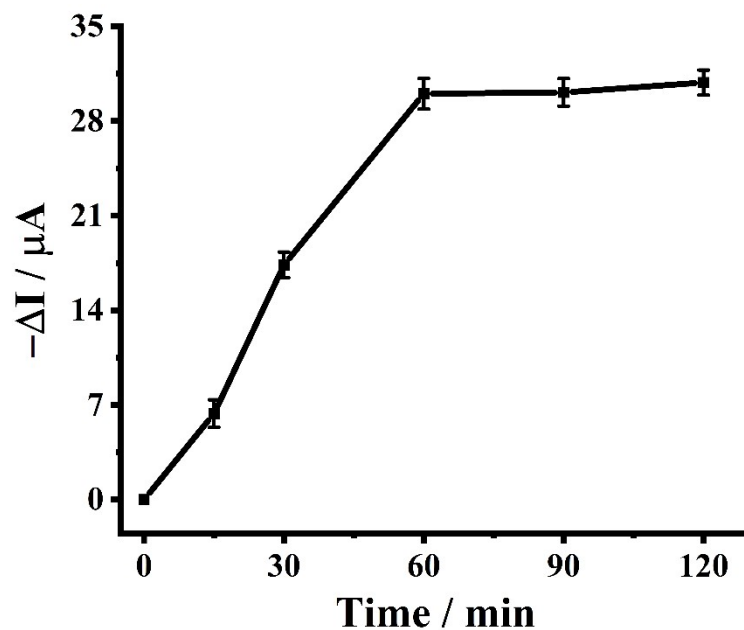

89

90 **Fig. S9** The effect of RBD ( $100.0 \text{ ng mL}^{-1}$ ) incubation time on the DPV response. Error

91 bars represent the standard deviations of three repeated determinations.

92

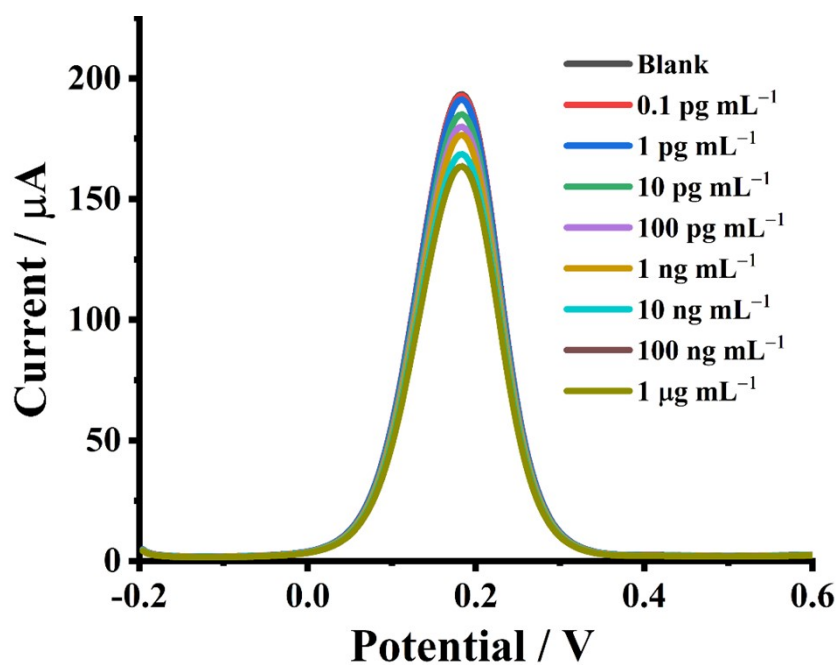

93

94 **Fig. S10** DPV curves of the cyclic peptide-based biosensor at different concentrations

95 of RBD.

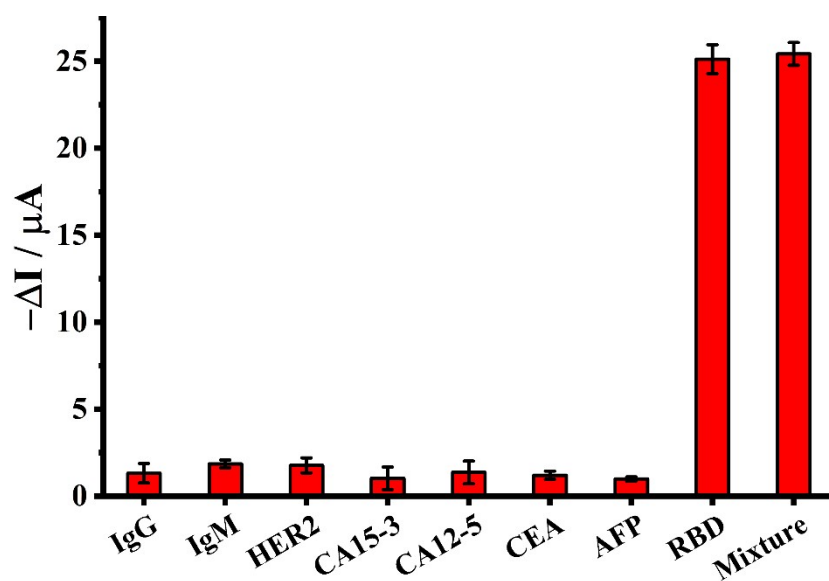

96

97 **Fig. S11** Responses of the biosensor to  $10.0 \text{ ng mL}^{-1}$  target (RBD), nonspecific proteins

98 (IgG, IgM, HER2, CA15-3, CA12-5, CEA, AFP) with higher concentrations ( $1.0 \mu\text{g}$

99  $\text{mL}^{-1}$ ), and mixture solution of above proteins. Error bars represent the standard

100 deviations of three parallel detections.

101

102

103

104

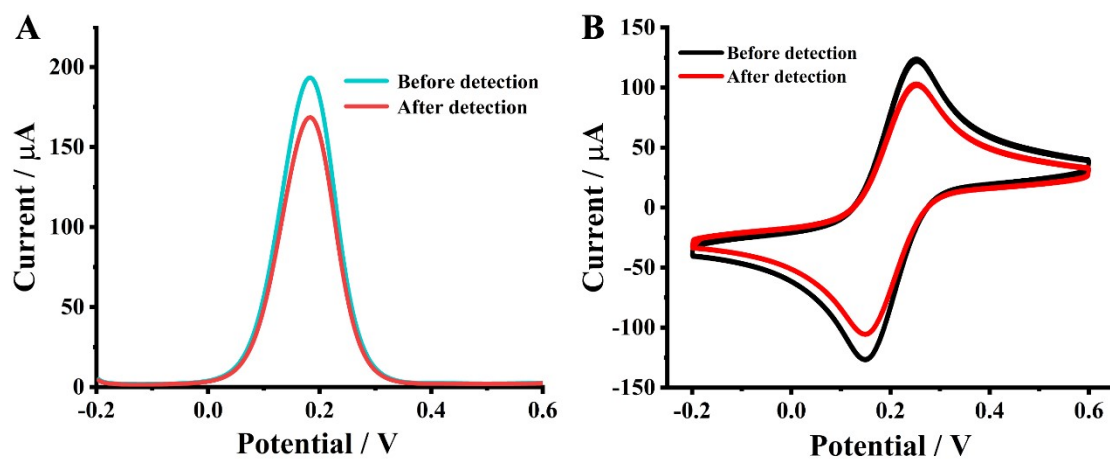

105

106 **Fig. S12** (A) Seven DPV scans in 5.0 mM  $[\text{Fe}(\text{CN})_6]^{3-/4-}$  solution of the biosensor

107 before and after the detection of 10.0 ng mL<sup>-1</sup> RBD. (B) 50 CV scans in 5.0 mM

108  $[\text{Fe}(\text{CN})_6]^{3-/4-}$  solution of the biosensor before and after the detection of 10.0 ng mL<sup>-1</sup>

109 RBD.

110

111

112

113

114

115

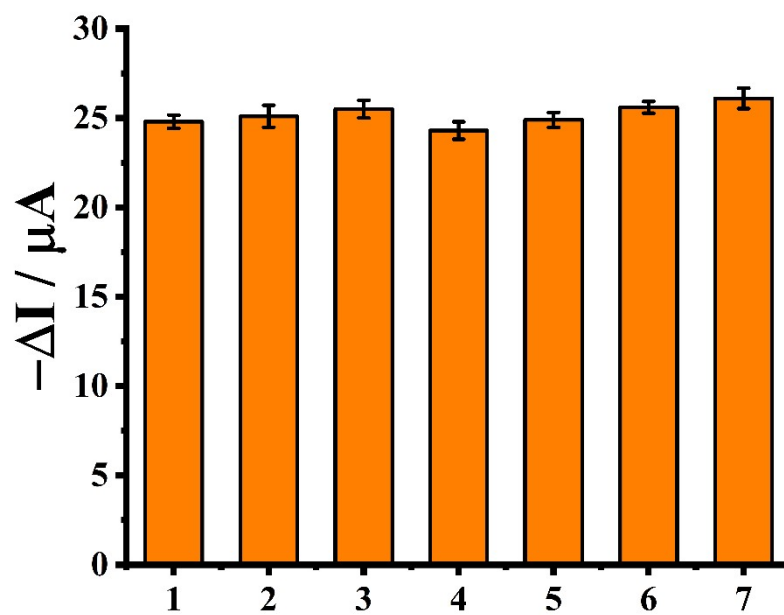

116

117 **Fig. S13** The reproducibility for the detection of  $10.0 \text{ ng mL}^{-1}$  RBD with seven

118 independently prepared biosensors. Error bars represent the standard deviations of three

119 parallel detections.

120

121

122

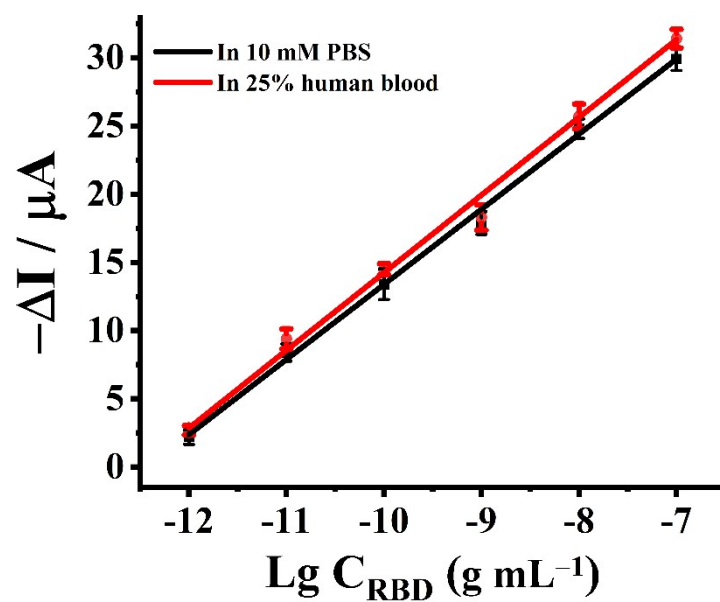

123

124 **Fig. S14** Calibration curves of the biosensor for the detection of RBD in 10.0 mM PBS

125 and 25% human blood (V/V). Error bars represent the standard deviations of three

126 parallel detections.

127

128

129 **Supplementary Table**

130

131 **Table S1 Performance comparison of different approaches for the antigen**

132 **detection of COVID-19.**

| Detection method         | Linear range                                       | Detection limit           | Ref.      |
|--------------------------|----------------------------------------------------|---------------------------|-----------|
| Electrochemical analysis | 2.0-40.0 pg mL <sup>-1</sup>                       | 0.7 pg mL <sup>-1</sup>   | [1]       |
| Electrochemical analysis | 0.002-100.0 pg mL <sup>-1</sup>                    | 0.577 fg mL <sup>-1</sup> | [2]       |
| Electrochemical analysis | 0.1-20.0 ng mL <sup>-1</sup>                       | 16.9 fg mL <sup>-1</sup>  | [3]       |
| Electrochemical analysis | 0.05-1.0 μg mL <sup>-1</sup>                       | 18.2 ng mL <sup>-1</sup>  | [4]       |
| SERS immunoassay         | 1.0-6.0 fg mL <sup>-1</sup>                        | 4.7 fg mL <sup>-1</sup>   | [5]       |
| Electrochemical analysis | 1.0 pg mL <sup>-1</sup> -100.0 ng mL <sup>-1</sup> | 0.45 pg mL <sup>-1</sup>  | This work |

133

134

135

136

137

138

139



## 140 References

- 141 1 Amouzadeh Tabrizi M, Fernández-Blázquez JP, Medina DM, Acedo P. *Biosens. Bioelectron.*,  
142 2022, 196: 113729
- 143 2 Aydın EB, Aydın M, Sezgintürk MK. *Sens. Actuators B*, 2021, 345: 130355
- 144 3 Ali MA, Hu C, Jahan S, Yuan B, Saleh MS, Ju E, Gao S-J, Panat R. *Adv. Mater.*, 2021, 33: 2006647
- 145 4 Soto D, Orozco J. *Anal. Chim. Acta*, 2022, 1205: 339739
- 146 5 Mohammadi M, Antoine D, Vitt M, Dickie JM, Sultana Jyoti S, Wall JG, Johnson PA, Wawrousek  
147 KE. *Anal. Chim. Acta*, 2022, 1229: 340290
